# Supplementary material
Source: publisher site journal article supplement (https://www.dovepress.com/article/507740)
Supplement: Supplementary file 1 [file supplement%20materials_2.pdf]

## Supplementary Materials

### Establishing of a National Diagnostic Reference Level for Radiation Dose in Digital Paediatric Pelvic X-Rays in Jordan: A Multicenter Retrospective Study

Malak Al Hawadi.<sup>1</sup> Mohammad Ayasrah<sup>1</sup>

<sup>1</sup> Department of Allied Medical Sciences,  
Faculty of Applied Medical Sciences,  
Jordan University of Science and Technology.  
P.O. Box 3030, 22110 Irbid, Jordan

#### Supplementary Material Table S1 : List of Abbreviations

| Abbreviation | Full Term                                           |
|--------------|-----------------------------------------------------|
| ACR          | American College of Radiology                       |
| ALARA        | As Low As Reasonably Achievable                     |
| CR           | Computed Radiography                                |
| DR           | Digital Radiography                                 |
| DRL          | Diagnostic Reference Level                          |
| ECA          | Export Credit Agency                                |
| ESD          | Entrance Surface Dose                               |
| FSD          | Focus-to-Skin Distance                              |
| HCAC         | Health Care Accreditation Council                   |
| ICRP         | International Commission on Radiological Protection |
| IQR          | Interquartile Range                                 |
| MOH          | Ministry of Health                                  |
| NDRL         | National Diagnostic Reference Level                 |
| Q1           | First Quartile                                      |
| Q3           | Third Quartile                                      |
| RMS          | Royal Medical Services                              |
| SD           | Standard Deviation                                  |
| UNIV         | University-affiliated Hospital                      |
| kVp          | Kilovoltage Peak                                    |
| mAs          | Milliampere-seconds                                 |
| AP           | Anterior-Posterior                                  |
| mGy          | Milli-Gray                                          |
| MI           | Medical Imaging                                     |
| ICRP         | International Commission on Radiological Protection |
| MENA         | Middle East and North Africa                        |
| PRIV         | Private Hospital                                    |
| QC           | Quality Control                                     |
| DICOM        | Digital Imaging and Communications in Medicine      |
| ANOVA        | Analysis of Variance                                |

|         |                                                                        |
|---------|------------------------------------------------------------------------|
| IRB     | Institutional Review Board                                             |
| NRPB    | National Radiological Protection Board                                 |
| UNSCEAR | United Nations Scientific Committee on the Effects of Atomic Radiation |
| AEC     | Automatic Exposure Control                                             |

**Supplementary Table S2: Features of the X-ray Equipment**

| Manufacturer          | Type | Total filtration (mm Al) ‡ | Exposure Setting |
|-----------------------|------|----------------------------|------------------|
| PHILIPS               | DR*  | 2.5                        | AEC and Manual   |
| PHILIPS               | CR** | 2.5                        | AEC†             |
| SHIMADZU              | CR   | 1.5                        | Manual           |
| SIEMENS               | DR   | 2.5                        | AEC and Manual   |
| GENERAL ELECTRIC (GE) | DR   | 2                          | AEC              |
| CARESTREAM            | DR   | 2                          | AEC              |
| CARESTREAM            | CR   | 2                          | Manual           |
| FUJIFILM              | CR   | 2.5                        | Manual           |

\*Digital Radiography; \*\*Computed Radiography; †Automatic Exposure Control; ‡ millimeters of aluminum filtration.
